# Supplementary material
Source: PubMed Central journal article supplement (PMC2764424)

## Supplementary Data

**Figure S1. Controls of  $\Delta$ Np63 isoforms overexpression.** Western Blot analysis performed with a pan-p63 antibody on total extracts from H1299 (left) and MCF-7 (right) cells transfected with pcDNA3 vectors expressing the cDNAs of each  $\Delta$ Np63 isoform, to detect the intracellular levels of exogenously expressed isoforms. The lower bands observed in ectopically expressed  $\Delta$ Np63 $\delta$  and  $\Delta$ Np63 $\epsilon$  are likely due to an alternative initiation of translation, downstream the first ATG (22). The molecular weights of protein markers are shown on the left.

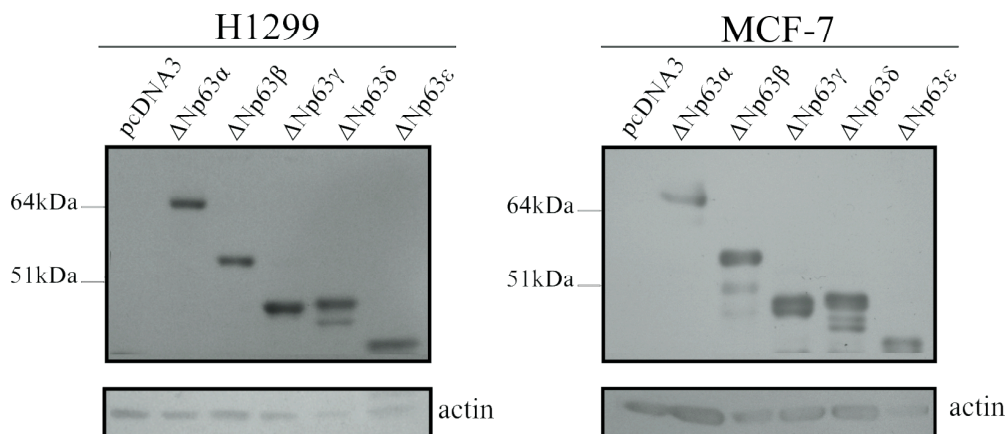

Supplement: gkp674_1.pdf [file gkp674_1.pdf]
